# Supplementary material
Source: Frontiers journal article supplement (https://www.frontiersin.org/articles/454494)
Supplement: Data_Sheet_1.PDF [file Data_Sheet_1.PDF]

## **Supplementary Material**

### **Leucine-Rich Repeat Kinase 2 is Associated with Activation of the Paraventricular Nucleus of the Hypothalamus and Stress-Related Gastrointestinal Dysmotility**

**Tatsunori Maekawa<sup>1\*</sup>, Hiromichi Tsushima<sup>1,2</sup>, Fumitaka Kawakami<sup>1</sup>, Rei Kawashima<sup>1</sup>, Masaru Kodo<sup>1</sup>, Takafumi Ichikawa<sup>1</sup>**

<sup>1</sup>Department of Regulation Biochemistry, Graduate School of Medical Sciences, Kitasato University, Sagamihara, Kanagawa Japan.

<sup>2</sup>Department of Behavioral Medicine, Tohoku University Graduate School of Medicine, Sendai, Miyagi, Japan.

**\* Correspondence:**

Dr. Tatsunori Maekawa

maekawa@kitasato-u.ac.jp

#### **Supplementary Figure Legend**

**Supplementary Figure 1** | No abnormalities of metabolism in LRRK2-KO mice.

Weight fluctuation and metabolism in terms of food intake, feces production, water intake, and urine volume excreted daily were measured using metabolic cages.  $n = 6$  per group.
